# Supplementary material
Source: PubMed Central journal article supplement (PMC2567147)
Supplement: 0807219105_0807219105SI.pdf [file 0807219105_0807219105SI.pdf]

**Table S2. Oligonucleotides used to amplify the human *COMT2* gene**

| Exon | Primers              |                      | Annealing Temp., °C |
|------|----------------------|----------------------|---------------------|
|      | Forward (5'-3')      | Reverse (5'-3')      |                     |
| 1    | TCTTACGGCAACAGCATC   | CCTCCTCCTTCCTTTAGGG  | 55                  |
| 2    | GTGACAGCAGCAGCCTCAG  | ATAGGTGAGTGATGCGGTGG | 55                  |
| 3    | TGCCACTGGTGGTAACATTG | ATTCCTCACTGTCTTGGGG  | 55                  |
| 4    | GAGGCAGGTAGGCATTTGAG | GGAGTCCTTACAAGGGATG  | 55                  |
| 5    | GGGGTCTTGACTGGGAGAAC | GAAAGGGAGGGGATTTGAG  | 55                  |
